# Supplementary material for: Two-stage thiol-based click reactions for the preparation and adhesion of hydrogels
Source: Royal Society of Chemistry journal article supplement (doi:10.1039/c9py01503e), 2020-01-01
Supplement: c9py01503e1.pdf [file c9py01503e1.pdf]

## Supporting Information

### Two-stage thiol-based click reactions for the preparation and adhesion of hydrogels

Wen Jing Yang,<sup>a</sup> Wenya Xu,<sup>a</sup> Xi Tao,<sup>a</sup> Wen Wang,<sup>a</sup> Yaqin Hu,<sup>a</sup> Xue Li,<sup>b</sup> En-Tang Kang,<sup>c</sup> and Lianhui Wang<sup>\*a</sup>

<sup>a</sup> Key Laboratory for Organic Electronics and Information Displays & Jiangsu Key Laboratory for Biosensors, Institute of Advanced Materials (IAM), Jiangsu National Synergetic Innovation Center for Advanced Materials (SICAM), Nanjing University of Posts & Telecommunications, 9 Wenyuan Road, Nanjing 210023, China

<sup>b</sup> Key Laboratory of Biomedical Polymers of Ministry of Education, College of Chemistry and Molecular Science, Wuhan University, Wuhan, Hubei 430072, China

<sup>c</sup> Department of Chemical & Biomolecular Engineering, National University of Singapore, Kent Ridge, 119260, Singapore

\*To whom correspondence should be addressed

Email address: [iamlhwang@njupt.edu.cn](mailto:iamlhwang@njupt.edu.cn)

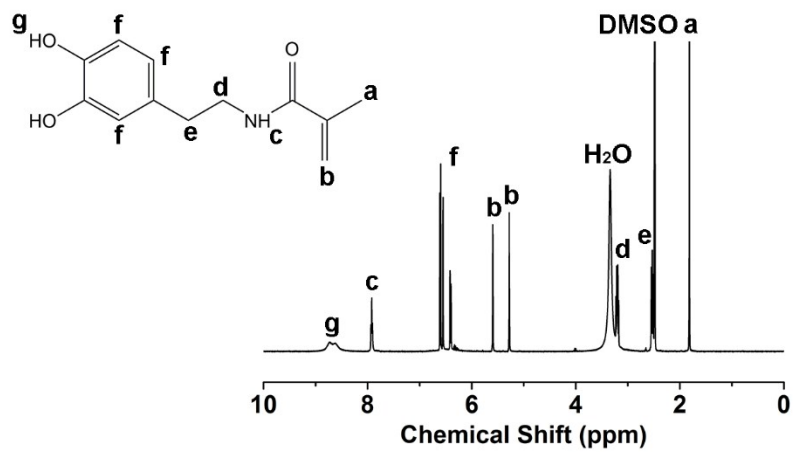

Figure S1 <sup>1</sup>H NMR spectrum of *N*-(3, 4-dihydroxyphenethyl) methacrylamide (DMA) in DMSO-d<sub>6</sub>.

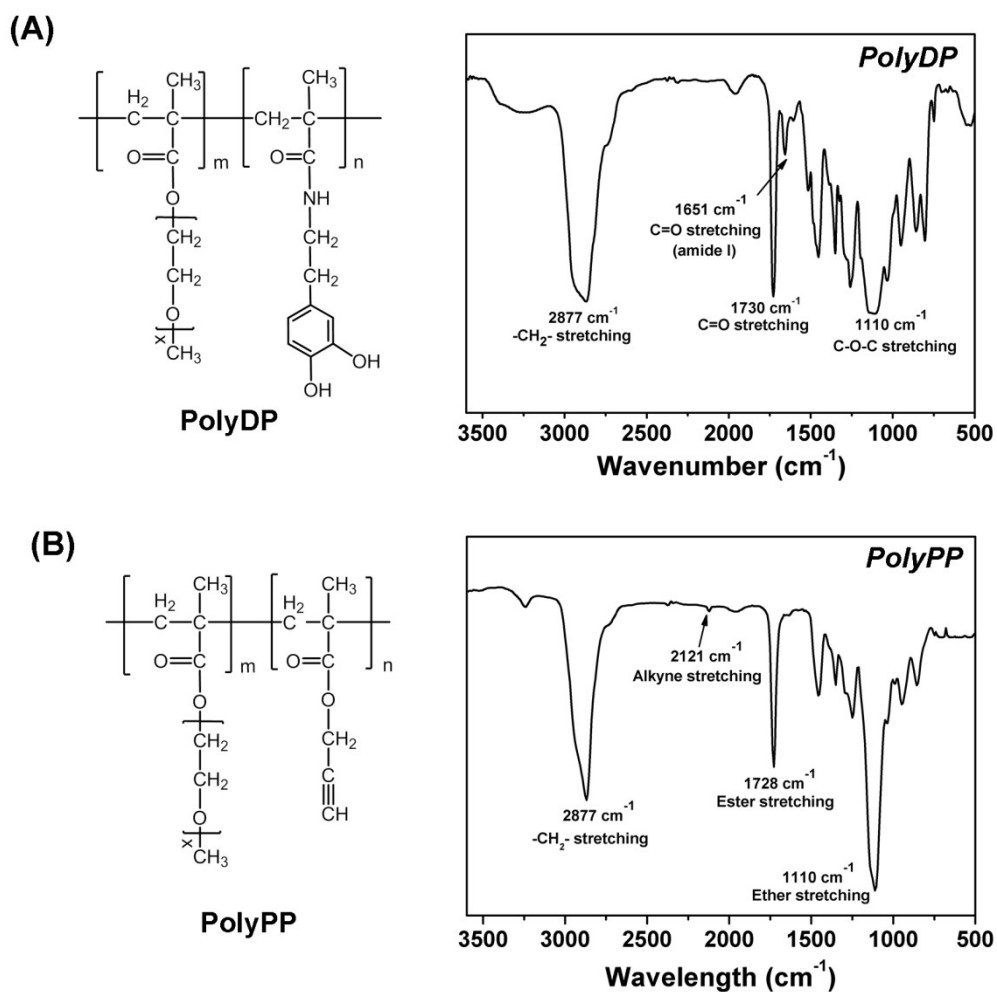

**Figure S2** The FT-IR spectra for the copolymer (A) poly(DMA-*co*-PEGMA) (polyDP) and (B) poly(PMA-*co*-PEGMA) (polyPP)

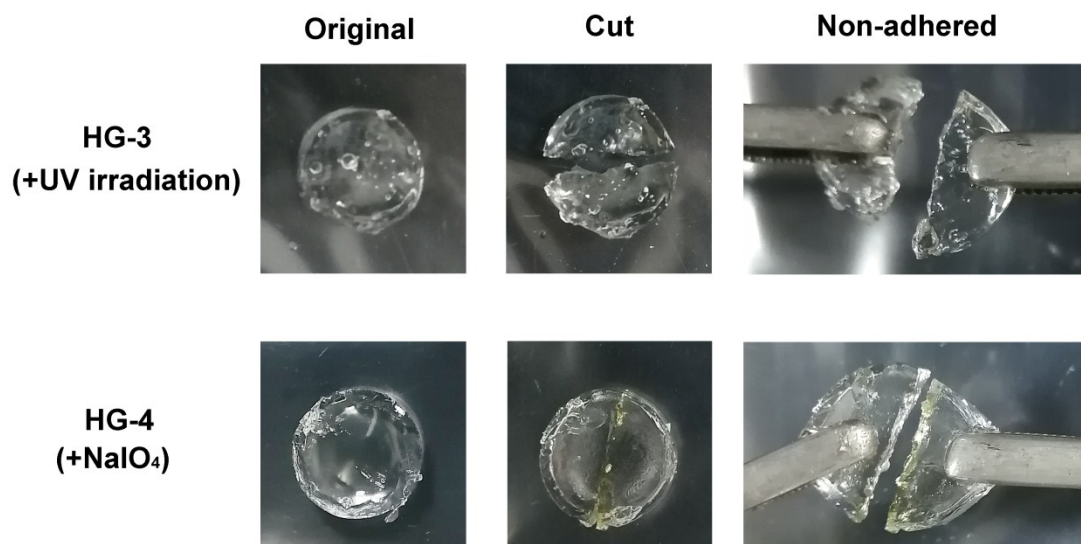

**Figure S3** The self-adhesion performances for HG-3 (prepared by poly(DMA-*co*-PEGMA) and 4-arm thiol-PEG) under UV irradiation for 20 minutes and HG-4 (prepared by poly(PMA-*co*-PEGMA) and 4-arm thiol-PEG) with addition of NaIO<sub>4</sub> ([NaIO<sub>4</sub>]: 5.25 mg/mL, 25  $\mu$ L~50  $\mu$ L)

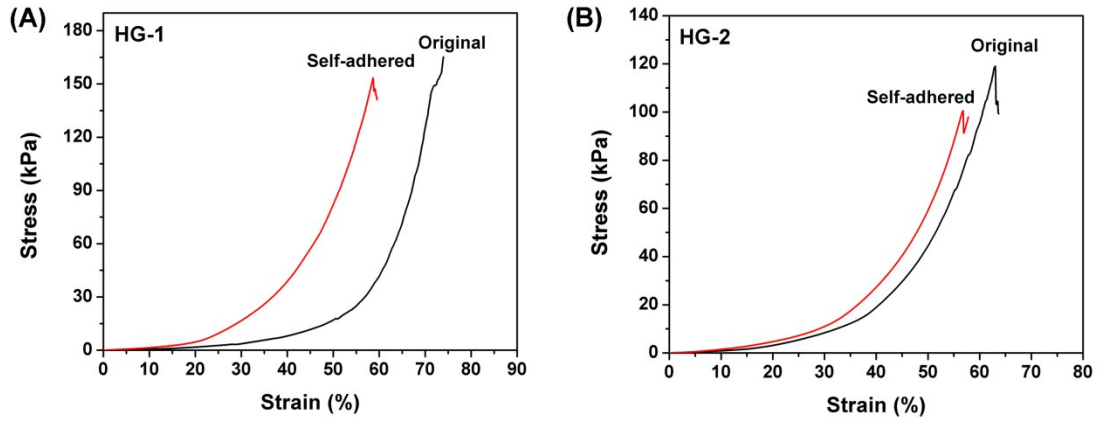

**Figure S4 The stress-strain curves of the original and self-adhered hydrogels. (A) HG-1 hydrogel, (B) HG-2 hydrogel**

**Table S1 The gelation pictures for 4-arm PEG-SH added with NaIO<sub>4</sub> aqueous solution and NaIO<sub>4</sub> in poly(PDP) solution**

| [NaIO <sub>4</sub> ] <sup>a</sup>                                                      | 6.5 mg/mL                                                                         | 7.5 mg/mL                                                                          | 10.5 mg/mL <sup>b</sup>                                                             | 12 mg/mL                                                                            |
|----------------------------------------------------------------------------------------|-----------------------------------------------------------------------------------|------------------------------------------------------------------------------------|-------------------------------------------------------------------------------------|-------------------------------------------------------------------------------------|
|                                                                                        | ×                                                                                 | ×                                                                                  | ×                                                                                   | ✓                                                                                   |
| NaIO <sub>4</sub> in H <sub>2</sub> O solution<br>(0.25 mL)+<br>4-arm PEG-SH (0.25 mL) |  |  |  |  |
|                                                                                        | ✓                                                                                 | ✓                                                                                  | ✓                                                                                   | ✓                                                                                   |
| NaIO <sub>4</sub> in poly(PDP)<br>solution (0.25 mL)+4-arm<br>PEG-SH (0.25 mL)         |  |  |  |  |

<sup>a</sup>: 25 μL of NaIO<sub>4</sub> was added.

<sup>b</sup>: The final concentration of NaIO<sub>4</sub> was 0.046 wt% in the pre-solution for hydrogel preparation.
